## **A Scoping Review on Influence of Socioeconomic Status on Antenatal Care Utilization and Pregnancy Outcomes in Sub-Saharan Africa**

Authors: Adeyemo Queen Esther<sup>1,2,3</sup>

Haphsheitu Yahaya<sup>2</sup>

Ajayi O. Esther<sup>2</sup>

Priscilla Aboagye-Mensah<sup>2</sup>

Adeyemo J. Blessing<sup>4</sup>

Theckla E. Ikome<sup>5</sup>

Affiliations: 1. Department of Community, Family and Addiction Sciences, Texas Tech University, Lubbock, Texas, USA.

Affiliations 2: Regional Institute for Population Studies, University of Ghana, Accra, Ghana.

Affiliations 3: Country Director, Reproductive Health for All, Abuja, Nigeria.

Affiliations 4: Program Director, Reproductive Health for All, Abuja, Nigeria.

Affiliations 5: Country Director, Reproductive Health for All, Buea, Cameroon.

1    **Abstract**

2    Maternal and perinatal mortality are the most adverse pregnancy outcomes of public health  
3    concerns. Although, slowly declining, Sub-Saharan Africa (SSA), has been reported as one of  
4    the regions with the highest incidence globally. Regions in SSA where these problems are  
5    prominent have been reported to have poor access to antenatal care services. Since  
6    socioeconomic factors are major factors influencing the use of antenatal care services and  
7    pregnancy outcomes. This study, therefore, aimed to explore the socioeconomic determinants of  
8    antenatal care utilization and pregnancy outcomes in Sub-Saharan countries. Studies were  
9    systematically searched using credible search engines, whereby 82 studies based on the selection  
10   criteria from eight countries with reported maximum burden of study were found. Consistently  
11   across all reviewed studies, poor socioeconomic status was a significant determinant of  
12   Antenatal care utilization thus leading to poor pregnancy outcomes, particularly, low income,  
13   and education. The impact of occupation on the other hand has been poorly studied. Poor  
14   socioeconomic factors also limit the use of antenatal care services, increasing the burden of the  
15   deaths. The study therefore submits that, interventions, and policies to reduce maternal and  
16   perinatal mortality should focus on improving pregnant women's' lives by improving access to  
17   antenatal care services pre- and postnatal period.

18

19    Keywords: Socioeconomic factors, Maternal Mortality, Perinatal Mortality, and Antenatal Care  
20    services, Sub-Sahara Africa

21

22

## 23 **Introduction**

24 The prenatal and postpartum periods of pregnancy are crucial for ensuring smooth and long-  
25 lasting transitions to long-term preventive health care because they are a window into future  
26 health [1]. Any complications during the pregnancy process, results in adverse pregnancy  
27 outcomes. Adverse pregnancy outcomes have been a significant public health issue around the  
28 world. These outcomes play a major role in maternal and perinatal mortality rates worldwide,  
29 with women of African descent more susceptible than those in developed countries [2].

30 Nearly 800 women die from pregnancy related causes. This is despite the claim that, the global  
31 maternal mortality rate (MMR) decreased by 38% between 2000 and 2017. Most maternal deaths  
32 occur in developing countries at a rate of 1 in 4,900 compared with 1 in 180 in developed  
33 countries, with 75% caused by pregnancy and childbirth-related problems according to WHO  
34 report. In the WHO's African Region, 45 out of 47 countries reported 147,741 maternal deaths in  
35 2010. Shockingly, this situation remains largely unchanged, with 99% of maternal deaths still  
36 occurring in underdeveloped nations, and more than half of these deaths happening in sub-  
37 Saharan Africa [3].

38 Perinatal mortality is characterized by severe adverse outcomes for children during pregnancy,  
39 and it is also a significant public health concern. Perinatal mortality is deaths occurring in vitro  
40 or intrauterine following the completion of 24 weeks of gestation (stillbirth) or within seven days  
41 of delivery (early neonatal death) [4]. Perinatal mortality falls into two categories: stillbirths  
42 (expressed per 1000 total births) and early neonatal mortality (expressed per 1000 live births). To  
43 combat child mortality therefore, Sustainable Development Goal (SDG) 3.2 aims to end  
44 preventable deaths of newborns and under-5 children, specifically reducing neonatal mortality to  
45 below 12 per 1000 live births and under-5 mortality to less than 25 per 1000 live births by 2030.

46 However, a report by the US National Statistic for the UN SDG revealed that many countries  
47 were not on track to meet these targets, especially in low and middle-income countries with  
48 unreliable mortality data.

49 One of the interventions in most African countries to improve pregnancy outcomes is ensuring  
50 free antenatal care services [5,6]. Recommendation on reducing adverse pregnancy outcomes has  
51 been centered on accelerating healthcare services to pregnant women before, during, and after  
52 pregnancy. The use of antenatal care services significantly reduces maternal and perinatal  
53 mortality [7]. However, majority of women of reproductive age group does not access antenatal  
54 care services or does partially, this utilization is believed to be influenced greatly by the women's  
55 socioeconomic characteristics [8]. Socioeconomic factors such as income level, education and  
56 type of occupation are important factors that influence pregnancy outcomes [5,9].

57 The Social Determinants of Health Theory (SDOH) is used as a framework to guide this  
58 research, suggesting that future studies and policies should focus on addressing these  
59 socioeconomic factors to improve pregnancy outcomes and reduce maternal and child mortality.  
60 Several studies [10,11] have reviewed and studied different aspects of SDOH on pregnancy  
61 outcomes and have recommended improving healthcare policies and services to improve  
62 pregnancy outcomes. However, with the recent change in the global economy and increased  
63 inflation and hardship before the global COVID-19 pandemic and worsened by it, there is need  
64 to focus on factors that can improve the living conditions of pregnant women. The objective of  
65 this study is therefore to systematically examine and synthesize evidence that supports the  
66 impact of socioeconomic economic status; poor education, poor income, and occupation, on poor  
67 utilization of antenatal care services and adverse pregnancy outcomes; maternal and perinatal  
68 mortality, under the following questions:

## 69 Research Questions

- 70 1. What is the extent of the impact of poor socioeconomic status disaggregated into the  
71 impact of education, occupation, and income on maternal and perinatal mortality in SSA  
72 countries with high maternal, perinatal mortality and poor ANC utilization.
- 73 2. What are the variations in the socioeconomic factors (impact of education, occupation,  
74 and income) affecting ANC utilization as well as maternal and perinatal mortality in SSA  
75 with low socioeconomic status.
- 76 3. To what extent have these socioeconomic barriers (poor education, occupation, and  
77 income) influenced access to antenatal care services among pregnant women from low  
78 socioeconomic backgrounds with high maternal and perinatal mortality in SSA

79 *The following elements can be renamed as needed and presented in any order:*

## 80 **Methods**

### 81 • **Selection of Relevant Studies**

82 Studies were searched using Google Scholar, SCOPUS, PubMed, and Elite search engines,  
83 majorly from credible journals; MEDLINE/PubMed, Cochrane Library, SCOPUS, CINAHL,  
84 Science Direct, and Directory of Open Access Journal (DOAJ) databases systematically. Specific  
85 keywords were grouped into five categories to search for relevant articles across the various  
86 databases following strictly PRISMA ScR research guidelines for conducting literature search  
87 for scoping reviews. The first category includes terms that describe the type of socioeconomic  
88 factors, which includes keywords like “social class”, “Income level”, “Wealth level”, “Education  
89 level”, “Occupation level”, “Standard of living”, “Social stratification” and “Economic  
90 background”. The second category includes terms that describe maternal and perinatal mortality,

91 such as "maternal death", "Maternal fatality", "Pregnancy-related death", "Obstetric mortality",  
92 "Maternal morbidity", and "Perinatal death", "Perinatal fatality", "Fetal mortality", "Stillbirth",  
93 "Neonatal mortality", "Infant mortality", "Newborn death", "Preterm birth", "Antenatal death",  
94 "Intrauterine fetal demise", "Fetal demise". The third category covers access and utilization to  
95 ANC or Prenatal care services, which includes keywords like "utilization," "access," "use,"  
96 "barriers," "facilitators," and "decisions." The fourth category represents the determinants, which  
97 includes keywords like "factors" and "determinants." Lastly, the fifth category describes the  
98 place of study, which includes "Sub-Saharan Africa", "Central Africa", and "Southern Africa",  
99 "East Africa", "West Africa". These search terms were combined using the Boolean operators  
100 "AND" and "OR."

#### 101 **Inclusion Criteria**

102 The search was limited to studies done in Sub-Saharan Africa (SSA) countries with poor  
103 socioeconomic status, high maternal mortality, and high perinatal mortality. Sub-Saharan Africa  
104 in this paper denotes countries geographically located in the 4 parts of the Sahara (western part,  
105 Eastern part, central part, and Southern part of Sub-Sahara Africa). Studies that matched the  
106 following requirements were considered for inclusion in the review.

- 107 1. Both qualitative and quantitative studies in academic journals published between 2010-2023.
- 108 2. Empirical peer-reviewed papers written in English
- 109 3. Papers that focused on antenatal care utilization, maternal and perinatal mortality

#### 110 **Characteristics of the Included Studies.**

111 This study was done in the Sub-Saharan African countries with poor level of income, poor  
112 literacy rate, poor occupational status, and poor antenatal care utilization yet with high  
113 prevalence of maternal and perinatal mortality. After all exclusion criteria were observed, a total

114 of 8 countries were selected out of 49 SSA countries for the study. Three countries from the  
115 Eastern Africa; Burundi, South Sudan, and Somalia, 4 from Western Africa; Nigeria, Guinea,  
116 Sierra Leone and The Gambia and one country from Northern Africa; Chad. The review involves  
117 82 studies out of the initial 2190 studies conducted between the year 2010 and 2023 after the  
118 inclusion criteria was applied (Figure 1). It includes 7 studies done in Burundi, 29 in Nigeria, 8  
119 in Guinea and 8 in The Gambia.

## 120 **Exclusion Criteria**

121 Papers on countries outside Sub-Sahara Africa; papers not related to socioeconomic status in the  
122 aspect of low income, high unemployment rate, and low level of education, papers not in the  
123 English Language were excluded.

## 124 **Outcome Definition**

125 **Perinatal mortality rate.** This is the sum of the number of deaths of a fetus after 28 weeks of  
126 viability to before the 7<sup>th</sup> day of life. Can be divided into stillbirths and early neonatal deaths.  
127 (WHO, 2006).

128 **Maternal mortality ratio (MMR).** This is defined as the number of maternal deaths during a  
129 given period per 100,000 live births during the same period.

130 Maternal deaths denote the death of a woman during pregnancy or within 42 days of the end of  
131 pregnancy from any cause related to pregnancy or aggravated by it and its management  
132 irrespective of the duration and site of the pregnancy expressed per 100,000 live births, for a  
133 specified period (WHO, 2015)

134

135

136

137

138

## Method

139 **Figure 1: PRISMA Flow chart of the studies included**

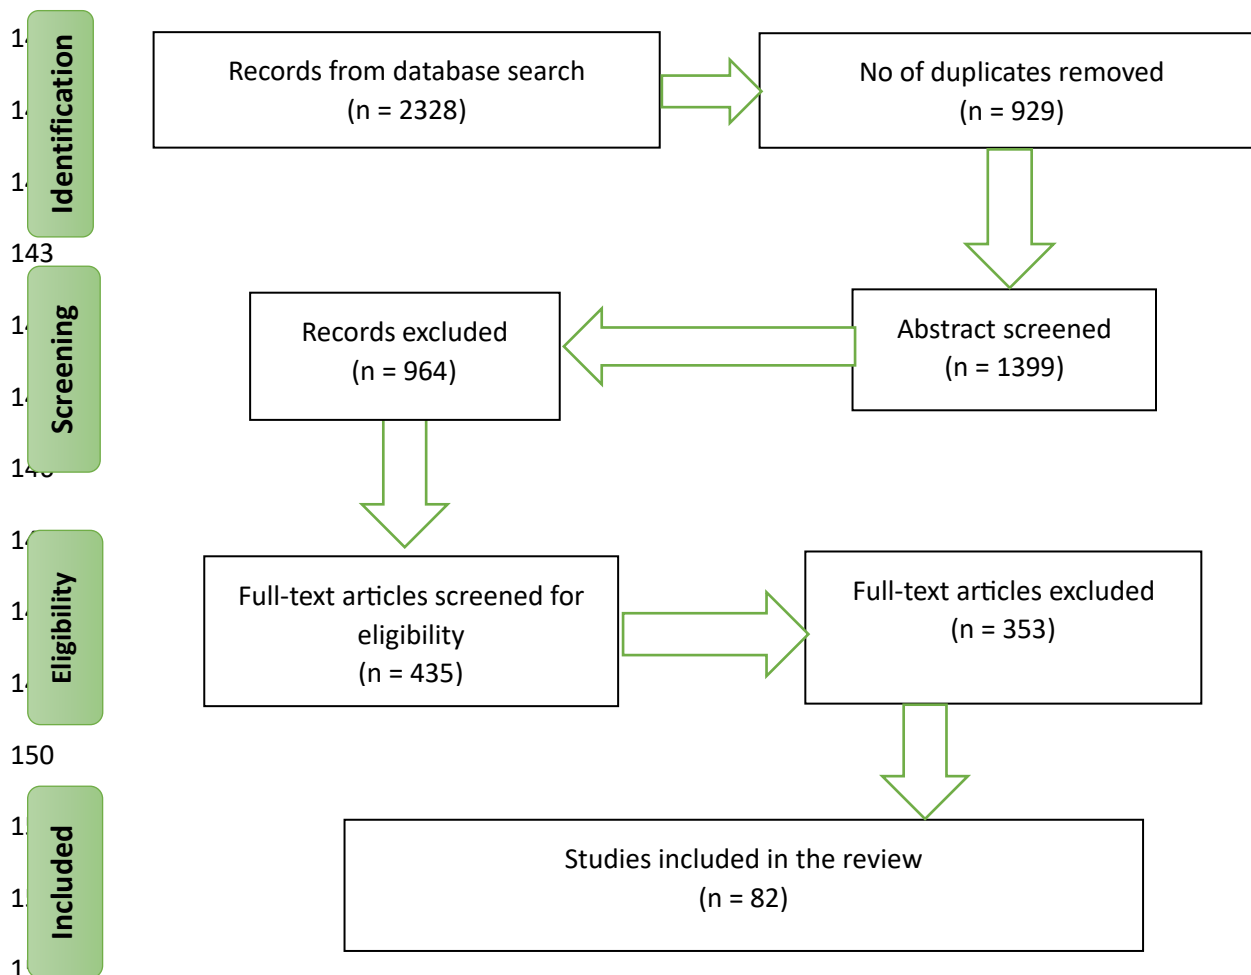

154

155

## 156 Results

### 157 Impact of Socioeconomic Status (SES) on Maternal Health Care Utilization

#### 158 SES on Maternal Health Care Utilization

159 Socioeconomic factors like education, income, and occupation were found to significantly  
160 impact ANC utilization [12]. Women from higher socioeconomic backgrounds have better



161 access to maternal health services, while those from lower socioeconomic positions report low  
162 utilization [1] and poor prognosis [13,14]. Several studies have also found that Socioeconomic  
163 barriers (with emphasis on education, occupation, and income) has influenced access to antenatal  
164 care services among pregnant women from low socioeconomic backgrounds [15-17]. For  
165 instance, a study investigated the availability and quality of emergency obstetric care in The  
166 Gambia's main referral hospital and examined the impact of socioeconomic factors on antenatal  
167 care services utilization. The study found that women from low socioeconomic backgrounds  
168 were less likely to utilize antenatal care services due to a lack of financial resources and  
169 transportation. In addition, the study found that women who lived far away from health facilities  
170 had limited access to antenatal care services. The study highlighted the need for policies and  
171 programs that address these socioeconomic barriers to improve access and utilization of antenatal  
172 care services in The Gambia [18]. Studies have shown that the situation in The Gambia and that  
173 of Burundi are similar and as we delve deeper into exploring the impact of the specific  
174 socioeconomic status on maternal health care as we progress

### 175 **Impact of Education on ANC**

176 The prevalence of Antenatal visits in Burundi is majorly below 6%, only the region of  
177 Bujumbura-Mairie has the highest ANC prevalence (24. 6%) and the lowest is in the West region  
178 (2.7%) [19]. Despite antenatal care (ANC), delivery and postnatal care being free at the point of  
179 use in Burundi, utilization of these services remains low: between 2011 and 2017, only 49% of  
180 pregnant women attended at least four ANC visits [20]. Some of the factors identified in this  
181 study suggested that factors such as women's education, their husbands' education level, where  
182 they live, whether they plan to become pregnant, family income, and the household wealth index  
183 are factors that influence whether they used antenatal care [19].

184 Over 46% of maternal deaths in Nigeria occurs among women who did not attend ANC clinics,  
185 had little or no education with low wealth status being the predominant factors [21]. Peculiarities  
186 exist between the northern part and southern parts of Nigeria. The northern part of Nigeria is  
187 particularly known for high burden of maternal mortality. The socioeconomic factors responsible  
188 for this disparity in use of care in pregnancy was mostly poor education, coupled with high level  
189 of ignorance, cultural dependence, and myths [22,23]. Whereas, in the southern parts of Nigeria,  
190 poverty and education were the most predominant factors [21,24,25]. In the rural region of the  
191 country, factors such as poor maternal formal education, unemployment, even partners  
192 education, household wealth were all significant in this study to affect ANC use [26], whereas in  
193 the urban areas there are few variations, though maternal formal education and that of their  
194 partners and wealth status were still important factors that influences maternal care usage.

195 The findings in Guinea are very similar to that of Nigeria. The factors that influence antenatal  
196 care utilization was mostly level of education and wealth status. Other factors were cultural in  
197 terms of power of decision making, religion and level of media awareness [15,27]. A qualitative  
198 study was done to assess the factors affecting the attendance and right timing of antenatal visits  
199 in Guinea, the findings were categorised into four factors which were related to accessibility to  
200 the care, their attitudes about ANC, knowledge of what it entails and other interpersonal reasons  
201 [27].

202 Jalu et. al claimed that like in other countries reviewed literacy and having formal education  
203 played a big role in anti-natal care utilization [28]. Moreover, lack of exposure to health  
204 education from health care providers and mass media/radio may also limit the knowledge of the  
205 community. This study revealed that an educated mother is more likely to utilize MHC compared  
206 to a mother with no education, being consistent with previous studies. Specifically, the odds of

207 ensuring a higher level of utilization are 1.33 times and 2.1 times greater among women with  
208 primary and at least secondary education respectively, than uneducated women. The education  
209 level of male spouses also has a significant effect on women's service utilization as women  
210 whose partners attained at least primary education are around 1.6 times more likely to benefit  
211 from MHC at a higher level [29].

212 In South Sudan, there is proof that maternal education cannot be overemphasized as long as ANC  
213 utilization is concerned. Based on the study conducted in South Sudan, pregnant women with  
214 primary and secondary level of education were 2.04 and 2.32 times, respectively, more likely to  
215 use ANC than women with no education [30]. This finding agreed with that of [31] that  
216 concluded that non-use of ANC services was also significantly higher among illiterate women  
217 and odds of non-attendance were lower in urban areas. In Sierre Leone, women with higher level  
218 of education were found to have higher odds to access maternal health care than those without  
219 formal education [32,33].

## 220 **Impact of Income on Maternal Health Care Utilization**

221 A study on Burundi concluded that pregnant women in this country experiences obstacles to  
222 timely access and usage of maternal health services due to factors like poverty, distances to  
223 medical facilities, and high expenses of health services [20]. Another study conducted in Burundi  
224 revealed that there is a highly substantial inverse association between per capita income and  
225 maternal mortality [34]. The data suggest that fewer maternal fatalities exist as household  
226 income increases, in Burundi. According to this study, there are significant disparities between  
227 maternal mortality rates in rich and developing nations. Women in low-income countries are  
228 dying because they have poor or no access to healthcare, or because the care they receive is of  
229 poor quality [34].

230 Similarly, income was the biggest identified challenge to ANC visit in Gambia especially in the  
231 rural communities where cases of maternal complications were common [18]. The study  
232 identified, inability to afford the services, cost of traveling to access the services and lack of  
233 means of transportation, all of which relate to influences of income level.

234 In Nigeria, women from wealthier households are more likely to utilize ANC services than those  
235 from poorer households [5,35,36]. In addition to income, the cost of antenatal care was a major  
236 barrier to utilization for women in Nigeria [24,37,38]. Interestingly, community level income  
237 influences antenatal care utilization. A study conducted in Nigeria assessed the moderation role  
238 of community level factors on maternal health care revealed how much this factor can be of  
239 influence. The study found that women who reside in poorer and poorly educated communities in  
240 Nigeria tend to have less appreciation for using maternal health care services [39]. Studies also  
241 found that women with lower income were more likely to delay seeking care due to financial  
242 constraints [26,39,40]. Further affirming the importance of income to MHC utilization in  
243 Nigeria.

244 Equally in Guinea the findings were similar to Nigeria, wealth status was a strong determinant  
245 for attending ANC. The rich had better access to antenatal care and easier deliveries [15], while  
246 majority of the women with low income in Guinea complained of the cost of attending ANC  
247 clinics and the ability to afford the care [27].

248 Somalia has limited and understaffed health care centres that works only a few hours per day, an  
249 inadequate payment system of salaries has made it difficult for mothers to pay right bills limiting  
250 their access to these antenatal services [41]. Another study in Somalia found that women whose  
251 monthly household income was below \$50 did not attend ANC [42,43]. In Chad an increase in  
252 wealth index increases the chances of ANC utilization [30].

253 The situation in South Sudan is similar to that of Chad whereby enabling resources, such as the  
254 household wealth index, were significantly associated with non-use of ANC services [31]. For  
255 instance, a study found that women from the top two household wealth quintiles had an increased  
256 utilization of the recommended number of four or more ANC visits compared to their  
257 counterparts from the lowest two quintiles [43]. Also, women of lower socioeconomic status and  
258 who specifically cannot afford to pay the transport fare to the health facility did not utilize ANC.

### 259 **Impact of Occupation on use ANC**

260 The sparse studies on occupation as a factor to influence ANC visit in Burundi found out that  
261 woman's likelihood of requesting ANC services from a qualified healthcare expert increases with  
262 her occupation, marital status, and money. Limited healthcare infrastructure and a shortage of  
263 skilled healthcare workers in rural areas may contribute to poor utilization of ANC services  
264 among women living in these areas according to Burundi's household Survey, 2016.

265 In The Gambia, a woman's capacity to access ANC services may depend on her employment  
266 condition. In rural Gambia, pregnant women were not given special treatment because they were  
267 still expected to perform their household tasks. They had a lot of work to do and few possibilities  
268 to take time off for illness. Also, the paucity of resources made it nearly impossible to get  
269 prenatal care. Women in polygamous households typically worked in the fields for little pay and  
270 received little financial support. Their spouses and other family members did not relieve them of  
271 their pregnancy-related domestic duties [43].

272 In Nigeria, increased employment led to decrease in usage of care, this could be due to the fact  
273 that most gainfully employed women in urban areas have limited time to attend ANC clinic due  
274 to tight work schedules. The impact of occupation on antenatal care utilization in Nigeria is

275 complex and multifaceted. Women in certain occupations may have more difficulty accessing  
276 ANC services due to factors such as long working hours, inadequate maternal leave policies, and  
277 lack of flexible work arrangements [26]. On the other hand, women in formal employment, such  
278 as civil servants, may have better access to ANC services due to the availability of maternal  
279 leave policies and flexible work arrangements that allow them to attend ANC appointments.  
280 Additionally, some formal sector employers offer health insurance benefits that cover ANC  
281 services, which can increase access and utilization [21].

282 However, women working in the informal sector, such as traders, may find it challenging to  
283 access ANC services due to the nature of their work and the lack of social protections. Several  
284 studies have shown that women in low-income occupations, such as agriculture and informal  
285 sector workers, have lower utilization of ANC services compared to those in high-income  
286 occupations, such as civil servants and professionals [43]. Furthermore, rural women tend to  
287 have lower utilization of ANC services compared to urban women, regardless of their occupation  
288 [14,44].

289 In addition to the possible impact of these unhealthy behaviours, being unemployed may have a  
290 negative impact on one's ability to pay for high-quality medical care. The budget on such  
291 income, for example, could encourage a limited healthy diet or underuse of healthcare during the  
292 vital period of pregnancy, raising the likelihood of an unfavourable outcome if a spouse depends  
293 on it to provide nutritious foods and adequate prenatal care [43].

294 Occupation plays a significant role in determining access to and utilization of ANC services in  
295 Nigeria. Women in low-income occupations and those in the informal sector are particularly  
296 vulnerable and may require targeted interventions to improve their access to ANC services.  
297 Policymakers and stakeholders should prioritize the development of policies and programs that

298 support working women's access to ANC services, regardless of their occupation, to improve  
299 maternal and child health outcomes [35,36,40].

300 Occupational status of the Guineans was a factor to determine their wealth status. Women who  
301 were more empowered or had partners who were, had better ANC attendance as well as better  
302 pregnancy outcomes [45,46]. A Somali study found that 72.0% of the respondents who were  
303 housewives did not attend ANC therefore there was a significant statistical association  
304 between respondents' occupation and ANC attendance and there was an association between the  
305 occupation of the husband and ANC utilization [42]. In Chad, women had lower odds of non-  
306 attendance if their partner worked in agriculture compared to those who had professional jobs  
307 [30].

### 308 **SES on Pregnancy Outcomes**

309 Several studies have found relationships between SES and pregnancy outcome (maternal and  
310 perinatal mortality) in Sub-Saharan Africa. Factors contributing to these high rates of maternal  
311 mortality include limited access to maternal healthcare services, low levels of education among  
312 women, poverty, and a shortage of skilled birth attendants.

### 313 **Impact of Education on Pregnancy Outcomes**

314 Education can influence a woman's knowledge about healthy pregnancy and childbirth practices,  
315 access to healthcare, and decision-making abilities related to their health and that of their baby.  
316 Studies have shown that maternal education is positively associated with improved pregnancy  
317 outcomes, including reduced risk of stillbirths, preterm birth, and low birth weight. Pregnancy-  
318 related problems led to around 303,000 maternal deaths worldwide in 2015 with majority of

319 these deaths occur in developing nations [6]. There is a strong belief that high educational status  
320 can improve pregnancy outcomes.

321 Maternal education is a critical factor that can impact pregnancy outcomes in Burundi.  
322 Unfortunately, education is limited in Burundi, particularly for girls, with high rates of illiteracy  
323 reported among the population [47]. The average number of ANC visits in Burundi is higher for  
324 women who complete tertiary education than for women without any formal education. This may  
325 be due to greater knowledge and awareness of the importance of ANC, as well as better access to  
326 healthcare services [20]. In Guinea, women who were more educated were more informed about  
327 the importance of antenatal care visits and had better access to healthcare too [27,48].

328 In The Gambia, education has been identified as a crucial factor in reducing both maternal and  
329 perinatal mortality rates [49]. Hence, increasing the level of education among women could lead  
330 to a significant reduction in maternal mortality in The Gambia [50]. The impact of education on  
331 maternal and perinatal mortality is greatly felt in Nigeria, as 42% of maternal mortality was as a  
332 result of lack of formal education [21]. Studies such as [5,51,52] further attributed lower rates of  
333 stillbirth and other perinatal and maternal mortality in Nigeria to maternal education.

334 Moving on to Somalia, maternal education was found to be a contributing factor to still births  
335 and perinatal mortality among Somali nationals [53]. In a Chad study, it was opined that the  
336 socioeconomic level measured through their education (as well as income and occupation) of the  
337 mother is an important predictor of malnutrition, poor health and mortality [54]. This affects the  
338 food habits and consequently the person 's health and may cause mortality of one or both mother  
339 and child. A study that was conducted in South Sudan concluded that maternal education was  
340 significantly associated with lower risk of unfavorable outcome and that this was primarily with  
341 the neo-natal death rate rather than the still birth rate [55]. Finally, a study conducted in Sierre



342 Leone found that children born to educated mothers had higher survival rates compared to those  
343 whose mothers were not educated [56].

#### 344 **Impact of Income on Pregnancy Outcomes**

345 Studies suggest that low-income levels and poverty are significant contributing factors to high  
346 mortality rates. Women in low-income households are less likely to access quality antenatal care,  
347 skilled birth attendants, and emergency obstetric care. Additionally, poverty affects nutrition,  
348 education, and living conditions, all of which can impact maternal and child health outcomes.  
349 poverty may limit access to antenatal care, skilled birth attendants, and emergency obstetric care,  
350 leading to higher rates of perinatal mortality [15,17,57,58].

351 A study revealed that there is a significant inverse relationship between per capita income and  
352 maternal mortality in Burundi. It reported that as household income increases, maternal deaths  
353 decrease, while holding all other factors constant. Additionally, the study also shows a negative  
354 relationship between government expenditure on the health sector and overall mortality rate,  
355 meaning that an increase in government allocation to health could reduce maternal deaths, but at  
356 a lower rate [34].

357 The situation is not so different In the Gambia, whereby money is a huge barrier to accessing  
358 comprehensive care in pregnancy and preventing birth complications to both mother and baby.  
359 Consistently, all the studies reviewed on the situation in Gambia, revealed lack of money as a  
360 factor leading to high cases of maternal and perinatal mortality in Gambia [18,59,60].

361 Nigeria, the largest country in terms of economy and population in Africa, has over 60% of her  
362 population living slightly above a dollar daily and over 80 million of the population lives in  
363 extreme poverty. Majority of the top causes of maternal and perinatal mortality are mostly as a

364 result of poverty, illiteracy and its accompanying ignorance level [61]. Studies also found a  
365 strong correlation between poverty and perinatal death with poverty considered to be an  
366 underlying factor linked to poor delivery outcomes [9,39]. Categorising these regions into two  
367 communities of rural and urban, overall, mortalities are higher in the rural communities where  
368 there is marked socioeconomic influence, which majorly is related to poor income, illiteracy and  
369 poor gainful employment [51,62,63].

370 In Somalia, absence of transport fare and low income affected access to proper care [64] and the  
371 chances of still births was found to be high among Somali women as a result of low income [53].  
372 Furthermore, Somalia's GDP per capita was found to affect the rate of maternal mortality [65].  
373 Findings from South Sudan revealed that family income significantly influences infant mortality  
374 since it is one of the most important determinants of the standard of living, economic and social  
375 welfare [66]. About 50.3% of the respondents were classified as low-income group; this  
376 definitely will affect the accessibility of the medical services. Contrary to what was found in  
377 other countries, mother's working status did not influence infant mortality in Sierre Leone [56].  
378 The mother's working status determines higher income possibilities.

### 379 **Impact of Occupation on Pregnancy Outcomes**

380 Occupation is another factor that have an impact on pregnancy outcomes, most women affected  
381 by birth complications are usually not skilfully employed as it can affect a woman's access to  
382 healthcare, exposure to harmful substances, and physical demands during pregnancy [60]. In  
383 general, occupations that involve exposure to harmful substances, such as agriculture or mining,  
384 can increase the risk of adverse pregnancy outcomes, including stillbirths, preterm birth, and low  
385 birth weight [67] Women in these occupations may also have limited access to healthcare and  
386 face additional physical demands during pregnancy, which can further increase the risk of

387 complications. On the other hand, occupations that provide better access to healthcare and allow  
388 for more flexibility, such as office-based jobs, may lead to better pregnancy outcomes. Women in  
389 these occupations may be better able to attend prenatal care appointments, manage their  
390 workload and stress levels during pregnancy, and take time off if needed [68].

391 Burundi is one of the poorest countries in the world, with a low socioeconomic status. The  
392 majority of the population lives in rural areas, and subsistence agriculture is the primary source  
393 of livelihood for many households. The country's economy is largely agricultural, with coffee  
394 and tea as the main exports. Additionally, the region faces a shortage of skilled labour,  
395 particularly in the healthcare sector. Women who are employed in skilled labour can afford  
396 professional maternal care [20]. However, there is limited research on this topic in Burundi  
397 specifically.

398 In The Gambia, most of the women affected by poor pregnancy outcomes are not gainfully  
399 employed and mostly work in farms or as housewives with several burdens that kept them  
400 mostly physically and psychologically exhausted [50,60]. A study done in The Gambia, reported  
401 that the common occupations of women include farming, market vending, and domestic work.

402 These occupations impact their pregnancies and births in several ways:

403 Physical demands: Farming and market vending involve physically demanding work that may  
404 require lifting heavy loads and working long hours. This can increase the risk of complications  
405 during pregnancy, such as premature labour, low birth weight, and fetal distress.

406 Limited access to healthcare: The women complained of their occupations giving them limited  
407 access to healthcare due to the nature of their work and financial constraints. This can result in

408 delayed prenatal care and poor management of pregnancy-related conditions, such as anaemia,  
409 hypertension, and gestational diabetes.

410 Stress: Domestic work can be emotionally and physically stressful, which can have negative  
411 effects on maternal and fetal health. Stress during pregnancy has been linked to preterm labour,  
412 low birth weight, and developmental delays in children [60].

413 Occupation was found to have an impact on maternal and perinatal mortality rates in Nigeria  
414 [61]. Women working in agriculture, mining, and fishing industries had a higher risk of maternal  
415 mortality in Nigeria. The study suggested that occupational health and safety measures and  
416 improved access to maternal health services could help reduce maternal mortality rates among  
417 women in these industries [22] women in professional occupations were more likely to use  
418 maternal health services, such as antenatal care and skilled birth attendants, than women in other  
419 occupations in Nigeria [22,61].

420 Women who work for pay in Guinea had better access to ANC visits compared to those who did  
421 not, and this was because of financial empowerment [46]. Employment status is a predictor of  
422 wealth status in Guinea [27]. Also, majority of the women who were traders complained about  
423 been too occupied to attend antenatal clinics. Occupational status of the partners was also a  
424 factor to determine ANC attendance by their partners [48].

425 In Somalia it was established by that many of the mothers often have the obligation to support  
426 the family through hard and poorly paid jobs or by selling items in the market, even during  
427 pregnancy which may predispose them to stress which can lead to perinatal and maternal  
428 mortality [64]. Occupation was mentioned as one of the socioeconomic determinants of infant  
429 and maternal mortality in Chad [54].

## 430 **Discussion**

431 The objective of this review is to elaborate on how specific socioeconomic factors (education,  
432 income and occupation) affect antenatal care service utilization as well as maternal and perinatal  
433 mortality in Sub-Saharan Africa. While the SES effect on the subject matter has been severely  
434 flogged, there remains limited evidence on how this SES specifically affects ANC and  
435 perinatal/maternal mortality. Hence, there is an urgent need to address this gap in the literature.  
436 Despite the global trend in policies of an almost-free to at-no-cost healthcare provisions for  
437 pregnant mothers, low level of income, poor and stressful occupation, and weak education has  
438 consistently been associated with poor birth outcomes [4,69]. This is particularly so in Sub-  
439 Saharan Africa as Nations in the West have better prognosis for fetal pregnancy outcomes,  
440 primarily attributed to the policies of care available to this population group in the form of health  
441 insurance.

442 The reviews reveal that the socio-economic factors limiting ANC utilization predispose women  
443 to high maternal and perinatal mortality and vary according to various regions in each country  
444 [59,70]. Categorizing these regions into two communities of rural and urban, overall, mortalities  
445 are higher in rural communities than in urban areas. Commonly in rural communities, there is a  
446 depleted healthcare system and the people are not able to transport to bigger cities for proper  
447 care, and this may invariably limit the ANC services provided, hence reducing utilization  
448 [26,71]. It is, therefore, essential that programs to empower and prompt better utilization of ANC  
449 should be focused on making it more accessible to the burdened communities [72].

450 Although the studies recorded other contributing SES factors across the countries', education and  
451 income are the common SES affecting both ANC utilization and pregnancy outcome (perinatal  
452 and maternal mortality) [17,73,74]. Poor education of women and their spouses was peculiar to

453 most of the findings in this study. The majority of the studies recommended that educating  
454 women will reduce the disparities in health-seeking behaviour which invariably improve ANC  
455 utilization. It is believed that improving education, particularly among women in SSA, will  
456 considerably minimize inequities in the consumption of ANC services and thereby reduce  
457 perinatal and maternal mortality.

458 Education has been identified ‘as a crucial factor in reducing both maternal and perinatal  
459 mortality rates across sub-Saharan Africa [6,39,75]. Women with no education had a  
460 significantly higher risk of maternal mortality than those with some. Increasing access to  
461 education for women, particularly in rural areas, can promote the use of ANC which could be an  
462 effective strategy for improving maternal and child health outcomes in the region [22,39].

463 Income was also revealed to be another limiting SES to the utilization of ANC due to limited  
464 access to appropriate medical treatment, which invariably exposes women to bad pregnancy  
465 outcomes (perinatal and maternal mortality) [71]. A significant inverse relationship between  
466 income and maternal mortality establishes that money is a considerable barrier to accessing  
467 comprehensive care in pregnancy and preventing birth complications to both mother and baby,  
468 many women may not be able to afford necessary care because of their personal limited income  
469 and that of their spouse [4,62,76]. A high risk of maternal death exists for those who cannot  
470 afford private hospitals and turn to mission homes and traditional means which further  
471 predisposes them to perinatal and maternal mortality [4,14,77].

472 Even though studies on the effect of occupation on ANC utilization and pregnancy outcome are  
473 limited. The review reveals that women's occupation in countries with high mortality cases is  
474 burdening [78,79]. Even housewives who are believed or expected to be less busy, are more  
475 engaged physically and emotionally and are mostly health-challenged [59,80]. On the hand,

476 women who are gainfully employed were revealed to have limited time for antenatal care  
477 services as well to report to the health facility early when some complications arise [26,81,82].  
478 Therefore, it is essential to prioritize the health and safety of pregnant women in these  
479 occupations by providing access to adequate healthcare, reducing physical demands, and  
480 addressing environmental and occupational hazards. This can lead to improved pregnancy  
481 outcomes and better health for both the mother and child.  
482 This study suggested that occupational status can impact maternal health outcomes in a country  
483 and that interventions to improve access to maternal health services should consider occupational  
484 differences, yet these have been poorly studied.

### 485 **Conclusion and Recommendation**

486 In summary, the impact of poor socio-economic status on antenatal care services utilization and  
487 pregnancy outcomes in Sub-Saharan Africa is a significant public health issue. There is a clear  
488 link between low socio-economic status, low antenatal care utilization, and negative pregnancy  
489 outcomes, including maternal and perinatal mortality. Insufficient income and low levels of  
490 education among women in many countries in the region are the leading contributors to low  
491 antenatal care utilization and high perinatal and maternal mortality.  
492 Efforts to improve the socio-economic status of women in Sub-Saharan Africa are essential to  
493 improving maternal and perinatal health outcomes. Initiatives such as increasing access to  
494 education, expanding access to healthcare services, and improving infrastructure in underserved  
495 areas can significantly impact. Additionally, community-based interventions that aim to improve  
496 awareness and knowledge about antenatal care, safe pregnancy, and childbirth practices can help  
497 to increase utilization and improve outcomes.

498 In conclusion, the impact of poor socio-economic status on antenatal care services utilization and  
499 pregnancy outcomes in Sub-Saharan Africa is a complex issue that requires a comprehensive and  
500 multidisciplinary approach. Improving the region's maternal and perinatal health outcomes will  
501 require sustained efforts and collaboration between governments, healthcare providers, civil  
502 society organizations, and communities. Nonetheless, it is achievable, and the benefits will be  
503 immense, not only for mothers and newborns but also for the region's overall development.

#### 504 **Limitations and Future Directions**

505 Occupational status and how it affects pregnancy outcomes as well as ANC visits was limited in  
506 all the studies identified. The impact of occupation is beyond the availability of money to pay for  
507 services related to healthcare, it also involves factors such as making time available to attend  
508 ANC and the nature of the job and how it can affect the outcome of pregnancy. Future studies  
509 must explore these factors, particularly through data collection in both quantitative and  
510 qualitative studies, to examine their impact.

511 One major limitation of this study is that most of the studies assessing the influence of socio-  
512 economic factors on pregnancy outcomes in SSA were done in rural communities where the  
513 problem was predominant. Education and income level were mostly implicated and thus  
514 recommended to empower women and educate them more, I would recommend for future  
515 research that similar studies should be done in peri-urban and urban cities where women are  
516 more empowered and educated to determine how these factors can also still negatively influence  
517 pregnancy outcomes and ANC visits.

518 There are variations to the socio-economic factors affecting pregnancy outcomes as well as  
519 antenatal care usage in Nigeria and need to be addressed differently, future studies should



520 examine the role of community-level social influence on pregnancy outcomes particularly in the  
521 other regions aside from the northern part of the country [39].

522

523 **Funding Declaration:**

524 In conducting this review study, no external funding was obtained. The research was undertaken  
525 as part of routine academic activities, and all resources utilized were provided by the authors  
526 themselves. This study was driven by the authors' intrinsic motivation to contribute to the  
527 existing literature in [your field or subject area]. The absence of external funding did not impact  
528 the design, execution, or reporting of the review, and the authors declare no conflicts of interest  
529 in relation to financial support.480

530

531

532

533

534

535

536

537

538

539

540

541

542

## 543 Reference

- 544 1. Yee LM, Miller EC, Greenland P. Mitigating the long-term health risks of adverse pregnancy  
545 outcomes. *Jama*. 2022;327(5):421–2.
- 546 2. Gibson-Helm M, Teede H, Block A, Knight M, East C, Wallace EM, et al. Maternal health  
547 and pregnancy outcomes among women of refugee background from African countries: a  
548 retrospective, observational study in Australia. 2014;
- 549 3. Maternal Health | WHO | Regional Office for Africa [Internet]. [cited 2023 Oct 8]. Available  
550 from: <https://www.afro.who.int/health-topics/maternal-health>
- 551 4. Vidiella-Martin J, Been JV, Van Doorslaer E, García-Gómez P, Van Ourti T. Association  
552 Between Income and Perinatal Mortality in the Netherlands Across Gestational Age.  
553 *Obstetrical & Gynecological Survey*. 2022 May;77(5):259–61.
- 554 5. Adewuyi EO, Zhao Y, Lamichhane R. Risk factors for infant mortality in rural and urban  
555 Nigeria: evidence from the national household survey. *Scand J Public Health*. 2017  
556 Jul;45(5):543–54.
- 557 6. Raru TB, Mamo Ayana G, Bahiru N, Deressa A, Alemu A, Birhanu A, et al. Quality of  
558 antenatal care and associated factors among pregnant women in East Africa using  
559 Demographic and Health Surveys: A multilevel analysis. *Womens Health (Lond Engl)*. 2022  
560 Jan;18:174550652210767.
- 561 7. Bekele H, Dheressa M, Mengistie B, Sintayehu Y, Fekadu G. Unintended Pregnancy and  
562 Associated Factors among Pregnant Women Attending Antenatal Care at Bako Tibe District  
563 Public Health Facility, Oromia Region, Ethiopia. *Journal of Pregnancy*. 2020 Mar  
564 19;2020:1–7.
- 565 8. Adedokun ST, Yaya S. Correlates of antenatal care utilization among women of reproductive  
566 age in sub-Saharan Africa: evidence from multinomial analysis of demographic and health  
567 surveys (2010–2018) from 31 countries. *Arch Public Health*. 2020 Dec;78(1):134.
- 568 9. Lanre-Abass BA. Poverty and maternal mortality in Nigeria: towards a more viable ethics of  
569 modern medical practice. *International Journal for Equity in Health*. 2008;7:1–9.
- 570 10. Amjad S. Association between Social Determinants of Health and Adverse Pregnancy  
571 Outcomes in Adolescent Mothers. 2018 [cited 2023 Oct 8]; Available from:  
572 [https://era.library.ualberta.ca/items/302b6507-4ed1-4181-9b74-  
573 77862963c749/download/fc4cb7ae-9354-47c7-b00d-92b26cde468b](https://era.library.ualberta.ca/items/302b6507-4ed1-4181-9b74-77862963c749/download/fc4cb7ae-9354-47c7-b00d-92b26cde468b)
- 574 11. Kozhimannil KB, Vogelsang CA, Hardeman RR, Prasad S. Disrupting the pathways of social  
575 determinants of health: doula support during pregnancy and childbirth. *The Journal of the  
576 American Board of Family Medicine*. 2016;29(3):308–17.
- 577 12. Garcia R. Social determinants of health. A Population Health Approach to Health Disparities  
578 for Nurses: Care of Vulnerable Populations [Internet]. 2022 [cited 2023 Oct 7]; Available

- 579 from:  
580 [https://books.google.com/books?hl=en&lr=&id=lgOBEAAAQBAJ&oi=fnd&pg=PA107&ots=o6qxUCcvPJ&sig=akVK66yv\\_Oqt2yv7ycRbllVqntQ](https://books.google.com/books?hl=en&lr=&id=lgOBEAAAQBAJ&oi=fnd&pg=PA107&ots=o6qxUCcvPJ&sig=akVK66yv_Oqt2yv7ycRbllVqntQ)  
581
- 582 13. Gurewich D, Garg A, Kressin NR. Addressing Social Determinants of Health Within  
583 Healthcare Delivery Systems: a Framework to Ground and Inform Health Outcomes. *J GEN*  
584 *INTERN MED*. 2020 May;35(5):1571–5.
- 585 14. Vincent AA, Verr JB, Iliya M. The effect of selected socioeconomic determinants of health  
586 on maternal/child health in Nigeria. *International Journal of Multidisciplinary Research and*  
587 *Analysis*. 2021;4(1):1–10.
- 588 15. Ahinkorah B, Ameyaw E, Seidu AA, Odusina E. Examining barriers to healthcare access and  
589 utilization of antenatal care services: evidence from demographic health surveys in sub-  
590 Saharan Africa | *BMC Health Services Research* | Full Text [Internet]. 2021 [cited 2023 Oct  
591 7]. Available from: [https://bmchealthservres.biomedcentral.com/articles/10.1186/s12913-](https://bmchealthservres.biomedcentral.com/articles/10.1186/s12913-021-06129-5)  
592 [021-06129-5](https://bmchealthservres.biomedcentral.com/articles/10.1186/s12913-021-06129-5)
- 593 16. Ameyaw EK, Dickson KS, Adde KS, Ezezika O. Do women empowerment indicators  
594 predict receipt of quality antenatal care in Cameroon? Evidence from a nationwide survey.  
595 *BMC Women’s Health*. 2021 Dec;21(1):343.
- 596 17. Simkhada B, Teijlingen ER van, Porter M, Simkhada P. Factors affecting the utilization of  
597 antenatal care in developing countries: systematic review of the literature. *Journal of*  
598 *advanced nursing*. 2008;61(3):244–60.
- 599 18. Barrow A, Jobe A, Onoh VI, Maduako KT. Prevalence and factors associated with  
600 institutional-based delivery in the Gambia: further analysis of population-based cross-  
601 sectional data. *African Journal of Reproductive Health*. 2020;24(2):176–86.
- 602 19. Barankanira E, Iradukunda A, Ntakaburimvo N, Ahishakiye W, Nsavyimana JC, Odjidja EN.  
603 Spatial distribution and predictive factors of antenatal care in Burundi: A spatial and  
604 multilevel baseline analysis for the third burundian demographic and health survey. *PloS*  
605 *one*. 2023;18(1):e0272897.
- 606 20. Habonimana D, Batura N. Empirical analysis of socio-economic determinants of maternal  
607 health services utilisation in Burundi. *BMC Pregnancy Childbirth*. 2021 Dec;21(1):684.
- 608 21. Akaba G, Dirisu O, Okunade K, Adams E, Ohioghame J, Obikeze O, et al. Impact of  
609 COVID-19 on utilization of maternal, newborn and child health services in Nigeria: protocol  
610 for a country-level mixed-methods study. *F1000Research* [Internet]. 2020 [cited 2023 Nov  
611 21];9. Available from: <https://www.ncbi.nlm.nih.gov/pmc/articles/PMC8422339/>
- 612 22. Ango UM, Oche MO, Abubakar IS, Awosan KJ, AU K, Raji MO. Effect of health education  
613 intervention on knowledge and utilization of health facility delivery services by pregnant  
614 women in Sokoto State, Nigeria. *International Journal of Contemporary Medical Research*.  
615 2018;5(6):F4–9.

- 616 23. Idris SH, Sambo MN, Ibrahim MS. Barriers to utilisation of maternal health services in a  
617 semi-urban community in northern Nigeria: The clients' perspective. *Nigerian Medical*  
618 *Journal: Journal of the Nigeria Medical Association*. 2013;54(1):27.
- 619 24. Olayinka OA, Achi OT, Amos AO, Chiedu EM. Awareness and barriers to utilization of  
620 maternal health care services among reproductive women in Amassoma community, Bayelsa  
621 State. *Int J Nurs Midwifery*. 2014;6(1):10–5.
- 622 25. Salami A. Socioeconomic Determinants of Maternal Health Services Utilization in Selected  
623 Rural and Urban areas of Kwara State, Nigeria. 2019 [cited 2023 Oct 8]; Available from:  
624 [https://www.researchgate.net/profile/Abdulganiyu-](https://www.researchgate.net/profile/Abdulganiyu-Salami/publication/352853222_Socioeconomic_Determinants_of_Maternal_Health_Services_Utilization_in_Selected_Rural_and_Urban_areas_of_Kwara_State_Nigeria/links/60dca46f299bf1ea9ed283b6/Socioeconomic-Determinants-of-Maternal-Health-Services-Utilization-in-Selected-Rural-and-Urban-areas-of-Kwara-State-Nigeria.pdf)  
625 [Salami/publication/352853222\\_Socioeconomic\\_Determinants\\_of\\_Maternal\\_Health\\_Services](https://www.researchgate.net/profile/Abdulganiyu-Salami/publication/352853222_Socioeconomic_Determinants_of_Maternal_Health_Services_Utilization_in_Selected_Rural_and_Urban_areas_of_Kwara_State_Nigeria/links/60dca46f299bf1ea9ed283b6/Socioeconomic-Determinants-of-Maternal-Health-Services-Utilization-in-Selected-Rural-and-Urban-areas-of-Kwara-State-Nigeria.pdf)  
626 [\\_Utilization\\_in\\_Selected\\_Rural\\_and\\_Urban\\_areas\\_of\\_Kwara\\_State\\_Nigeria/links/60dca46f2](https://www.researchgate.net/profile/Abdulganiyu-Salami/publication/352853222_Socioeconomic_Determinants_of_Maternal_Health_Services_Utilization_in_Selected_Rural_and_Urban_areas_of_Kwara_State_Nigeria/links/60dca46f299bf1ea9ed283b6/Socioeconomic-Determinants-of-Maternal-Health-Services-Utilization-in-Selected-Rural-and-Urban-areas-of-Kwara-State-Nigeria.pdf)  
627 [99bf1ea9ed283b6/Socioeconomic-Determinants-of-Maternal-Health-Services-Utilization-in-](https://www.researchgate.net/profile/Abdulganiyu-Salami/publication/352853222_Socioeconomic_Determinants_of_Maternal_Health_Services_Utilization_in_Selected_Rural_and_Urban_areas_of_Kwara_State_Nigeria/links/60dca46f299bf1ea9ed283b6/Socioeconomic-Determinants-of-Maternal-Health-Services-Utilization-in-Selected-Rural-and-Urban-areas-of-Kwara-State-Nigeria.pdf)  
628 [Selected-Rural-and-Urban-areas-of-Kwara-State-Nigeria.pdf](https://www.researchgate.net/profile/Abdulganiyu-Salami/publication/352853222_Socioeconomic_Determinants_of_Maternal_Health_Services_Utilization_in_Selected_Rural_and_Urban_areas_of_Kwara_State_Nigeria/links/60dca46f299bf1ea9ed283b6/Socioeconomic-Determinants-of-Maternal-Health-Services-Utilization-in-Selected-Rural-and-Urban-areas-of-Kwara-State-Nigeria.pdf)
- 629 26. Babalola SO. Factors associated with use of maternal health services in Haiti: a multilevel  
630 analysis. *Revista Panamericana de Salud Pública*. 2014;36:1–09.
- 631 27. Andrew EVW, Pell C, Angwin A, Auwun A, Daniels J, Mueller I, et al. Factors affecting  
632 attendance at and timing of formal antenatal care: Results from a qualitative study in  
633 Madang, Papua New Guinea. 2014 [cited 2023 Oct 8]; Available from:  
634 [https://pure.uva.nl/ws/files/2401212/155662\\_Andrew\\_et\\_al\\_2014.\\_Factors\\_affecting\\_attend](https://pure.uva.nl/ws/files/2401212/155662_Andrew_et_al_2014_Factors_affecting_attendance_antenatal_care.pdf)  
635 [ance\\_antenatal\\_care.pdf](https://pure.uva.nl/ws/files/2401212/155662_Andrew_et_al_2014_Factors_affecting_attendance_antenatal_care.pdf)
- 636 28. Jalu MT, Ahmed A, Hashi A, Tekilu A. Exploring barriers to reproductive, maternal, child  
637 and neonatal (RMNCH) health-seeking behaviors in Somali region, Ethiopia. *PLoS one*.  
638 2019;14(3):e0212227.
- 639 29. Kim S, Kim SY. Exploring factors associated with maternal health care utilization in Chad.  
640 *Journal of Global Health Science [Internet]*. 2019 [cited 2023 Nov 21];1(1). Available from:  
641 [https://www.e-](https://www.e-jghs.org/search.php?where=aview&id=10.35500/jghs.2019.1.e31&code=9986JGHS&vmode=FULL)  
642 [jghs.org/search.php?where=aview&id=10.35500/jghs.2019.1.e31&code=9986JGHS&vmode](https://www.e-jghs.org/search.php?where=aview&id=10.35500/jghs.2019.1.e31&code=9986JGHS&vmode=FULL)  
643 [=FULL](https://www.e-jghs.org/search.php?where=aview&id=10.35500/jghs.2019.1.e31&code=9986JGHS&vmode=FULL)
- 644 30. Carlson M, Smith Paintain L, Bruce J, Webster J, Lines J. Who attends antenatal care and  
645 expanded programme on immunization services in Chad, Mali and Niger? the implications  
646 for insecticide-treated net delivery. *Malar J*. 2011 Dec;10(1):341.
- 647 31. Mugo NS, Dibley MJ, Agho KE. Prevalence and risk factors for non-use of antenatal care  
648 visits: analysis of the 2010 South Sudan household survey. *BMC Pregnancy Childbirth*. 2015  
649 Dec;15(1):68.
- 650 32. Tsawe M, Susuman AS. Factors associated with the upsurge in the use of delivery care  
651 services in Sierra Leone. *Public Health*. 2020;180:74–81.

- 652 33. Kangbai DM, Bando DA, Manu A, Kangbai JY, Kenu E, Addo-Lartey A. Socio-economic  
653 determinants of maternal health care utilization in Kailahun District, Sierra Leone, 2020.  
654 BMC Pregnancy and Childbirth. 2022;22(1):276.
- 655 34. Muyombya MS, Rumuri BC. The Social-Economic Indicators of Maternal Mortality in  
656 Burundi (2005-2015). 2017 [cited 2023 Oct 8]; Available from:  
657 [https://www.academia.edu/download/54813493/social\\_economic\\_determinants\\_of\\_maternal](https://www.academia.edu/download/54813493/social_economic_determinants_of_maternal_mortality_in_Burundi.pdf)  
658 [\\_mortality\\_in\\_Burundi.pdf](https://www.academia.edu/download/54813493/social_economic_determinants_of_maternal_mortality_in_Burundi.pdf)
- 659 35. Adedokun ST, Uthman OA. Women who have not utilized health Service for Delivery in  
660 Nigeria: who are they and where do they live? BMC Pregnancy and Childbirth. 2019 Mar  
661 13;19(1):93.
- 662 36. Okafor II, Obi SN, Ugwu EO. Impact of Free Maternal and Child Healthcare programme  
663 on maternal and neonatal healthcare outcome in Enugu State of Nigeria. Nigerian Journal of  
664 Medicine. 2011;20(4):441–3.
- 665 37. Azuh D, Azuh A, Iweala E, Adeloye D, Akanbi M, Mordi R. Factors influencing maternal  
666 mortality among rural communities in southwestern Nigeria. IJWH. 2017 Apr;Volume  
667 9:179–88.
- 668 38. Nwosu CO, Ataguba JE. Socioeconomic inequalities in maternal health service utilisation: a  
669 case of antenatal care in Nigeria using a decomposition approach. BMC Public Health. 2019  
670 Dec;19(1):1493.
- 671 39. Ononokpono DN. Maternal health care in Nigeria: Do community factors moderate the  
672 effects of individual-level Education and Ethnic origin? African Population Studies.  
673 2015;29(1):1554–69.
- 674 40. Onyinye DW, Kalu UI, Martha A. Analysis of inequality in healthcare utilization among  
675 pregnant women in Nigeria: concentration index approach. International Journal of Asian  
676 Social Science. 2017;7(5):424–33.
- 677 41. Bogren M, Erlandsson K, Johansson A, Kalid M, Igal AA, Mohamed J, et al. Health  
678 workforce perspectives of barriers inhibiting the provision of quality care in Nepal and  
679 Somalia—A qualitative study. Sexual & Reproductive Healthcare. 2020;23:100481.
- 680 42. Omar F, Musili F. SOCIO-DEMOGRAPHIC AND ECONOMIC FACTORS ASSOCIATED  
681 WITH ANC ATTENDANCE AMONG WOMEN OF REPRODUCTIVE AGE. Journal of  
682 Health, Medicine and Nursing. 2020;5(1):48–59.
- 683 43. James EN, Miteu GD. A critical analysis of the extent to which social determinant of health  
684 explains health inequalities regarding maternal mortality in Nigeria. GSC Advanced  
685 Research and Reviews. 2022;12(1):113–9.
- 686 44. Fasina F, Oni G, Azuh D, Oduaran A. Impact of mothers' socio-demographic factors and  
687 antenatal clinic attendance on neonatal mortality in Nigeria. Amoo EO, editor. Cogent Social  
688 Sciences. 2020 Jan;6(1):1747328.

- 689 45. Yaya S, Uthman OA, Okonofua F, Bishwajit G. Decomposing the rural-urban gap in the  
690 factors of under-five mortality in sub-Saharan Africa? Evidence from 35 countries. *BMC*  
691 *Public Health*. 2019 Dec;19(1):616.
- 692 46. Merrell LK, Blackstone SR. Women's empowerment as a mitigating factor for improved  
693 antenatal care quality despite impact of 2014 Ebola Outbreak in Guinea. *International*  
694 *Journal of Environmental Research and Public Health*. 2020;17(21):8172.
- 695 47. Akombi BJ, Renzaho AM. Perinatal mortality in sub-Saharan Africa: a meta-analysis of  
696 demographic and health surveys. *Annals of global health* [Internet]. 2019 [cited 2023 Nov  
697 22];85(1). Available from: <https://www.ncbi.nlm.nih.gov/pmc/articles/PMC6634369/>
- 698 48. Shibre G, Zegeye B, Idriss-Wheeler D, Yaya S. Factors affecting the utilization of antenatal  
699 care services among women in Guinea: a population-based study. *Family Practice*.  
700 2021;38(2):63–9.
- 701 49. Oh J, Moon J, Choi JW, Kim K. Factors associated with the continuum of care for maternal,  
702 newborn and child health in The Gambia: a cross-sectional study using Demographic and  
703 Health Survey 2013. *BMJ open*. 2020;10(11):e036516.
- 704 50. Jammeh A, Sundby J, Vangen S. Barriers to emergency obstetric care services in perinatal  
705 deaths in rural Gambia: a qualitative in-depth interview study. *International Scholarly*  
706 *Research Notices* [Internet]. 2011 [cited 2023 Nov 22];2011. Available from:  
707 <https://downloads.hindawi.com/archive/2011/981096.pdf>
- 708 51. Adeolu M, Akpa OM, Adeolu AT, Aladeniyi IO. Environmental and socioeconomic  
709 determinants of child mortality: evidence from the 2013 Nigerian demographic health  
710 survey. *Am J Public Health Res*. 2016;4(4):134–41.
- 711 52. Onyejose KN, Ndep AO, Offiong DA, Omang JA, Otu FT. Sociocultural factors influencing  
712 maternal health outcomes in Nigeria. *Sci Res J*. 2019;7:86–96.
- 713 53. Damsted Rasmussen T, Villadsen SF, Kragh Andersen P, Smith Jervelund S, Nybo Andersen  
714 AM. Social and ethnic disparities in stillbirth and infant death in Denmark, 2005–2016.  
715 *Scientific Reports*. 2021;11(1):8001.
- 716 54. Obiang-Obounou BW, Fuh ME. The State of Maternal and Infant Health and Mortality in  
717 Chad. *African Journal of Reproductive Health*. 2020;24(1):26–34.
- 718 55. Ibrahim SA, Babiker AG, Amin IK, Omer MIA, Rushwan H. Factors associated with high  
719 risk of perinatal and neonatal mortality: an interim report on a prospective community-based  
720 study in rural Sudan. *Paediatric Perinatal Epid*. 1994 Apr;8(2):193–204.
- 721 56. Naz L, Patel KK. Determinants of infant mortality in Sierra Leone: applying Cox  
722 proportional hazards model. *International Journal of Social Economics*. 2020;47(6):711–26.
- 723 57. Musarandega R, Nyakura M, Machezano R, Pattinson R, Munjanja SP. Causes of maternal  
724 mortality in Sub-Saharan Africa: a systematic review of studies published from 2015 to



- 725 2020. *Journal of Global Health* [Internet]. 2021 [cited 2023 Oct 8];11. Available from:  
726 <https://www.ncbi.nlm.nih.gov/pmc/articles/PMC8542378/>
- 727 58. Tiruneh GT, Demissie M, Worku A, Berhane Y. Community's experience and perceptions of  
728 maternal health services across the continuum of care in Ethiopia: A qualitative study. *Plos*  
729 *one*. 2021;16(8):e0255404.
- 730 59. Laing SP, Sinmyee SV, Rafique K, Smith HE, Cooper MJ. Barriers to Antenatal Care in an  
731 Urban Community in the Gambia: An In-depth Qualitative Interview Study. *African Journal*  
732 *of Reproductive Health / La Revue Africaine de la Santé Reproductive*. 2017;21(3):62–9.
- 733 60. Lowe M, Chen DR, Huang SL. Social and cultural factors affecting maternal health in rural  
734 Gambia: an exploratory qualitative study. *PloS one*. 2016;11(9):e0163653.
- 735 61. Oriji PC, Kiridi EK, Abasi IJ. Maternal hydronephrosis in normal pregnancy in Bayelsa  
736 state, South-South Nigeria. *International Journal of Reproduction, Contraception, Obstetrics*  
737 *and Gynecology*. 2022;11(3):664–9.
- 738 62. Ezeh O, Uche-Nwachi E, Abada U, Agho K. Community-and proximate-level factors  
739 associated with perinatal mortality in Nigeria: evidence from a nationwide household survey  
740 | *BMC Public Health* | Full Text [Internet]. 2019 [cited 2023 Oct 8]. Available from:  
741 <https://bmcpublichealth.biomedcentral.com/articles/10.1186/s12889-019-7151-0>
- 742 63. Adekanmbi VT, Kandala NB, Stranges S, Uthman OA. Contextual socioeconomic factors  
743 associated with childhood mortality in Nigeria: a multilevel analysis. *J Epidemiol*  
744 *Community Health*. 2015;69(11):1102–8.
- 745 64. Aden JA, Ahmed HJ, Östergren PO. Causes and contributing factors of maternal mortality in  
746 Bosaso District of Somalia. A retrospective study of 30 cases using a Verbal Autopsy  
747 approach. *Global Health Action*. 2019 Jan 1;12(1):1672314.
- 748 65. Nafiu LA, Aauud AA, Adiukwu RN. Determinants of maternal mortality in Somalia. *The*  
749 *Pacific Journal of Science and Technology*. 2016;17(2):318–28.
- 750 66. Mahfouz MS, Surur AA, Ajak DAA, Eldawi EA. Level and determinants of infant and child  
751 mortality in Malakal Town-southern Sudan. *Sudanese journal of public health*.  
752 2009;4(2):250–5.
- 753 67. Moise IK. Causes of morbidity and mortality among neonates and children in post-conflict  
754 Burundi: a cross-sectional retrospective study. *Children*. 2018;5(9):125.
- 755 68. Memiah P, Bond T, Opanga Y, Kingori C, Cook C, Mwangi M, et al. Neonatal, infant, and  
756 child mortality among women exposed to intimate partner violence in East Africa: a multi-  
757 country analysis. *BMC Women's Health*. 2020 Dec;20(1):10.
- 758 69. Joseph KS, Liston RM, Dodds L, Dahlgren L, Allen AC. Socioeconomic status and perinatal  
759 outcomes in a setting with universal access to essential health care services. *Cmaj*.  
760 2007;177(6):583–90.

- 761 70. Afulani P. PLOS ONE. 2015 [cited 2023 Oct 8]. Rural/Urban and Socioeconomic  
762 Differentials in Quality of Antenatal Care in Ghana | PLOS ONE. Available from:  
763 <https://journals.plos.org/plosone/article?id=10.1371/journal.pone.0117996>
- 764 71. Madaj B, Gopalakrishnan S, Quach A, Filiaci S, Traore A, Bakusa D, et al. Where is the ‘C’  
765 in antenatal care and postnatal care: A multi\_country survey of availability of antenatal and  
766 postnatal care in low- and middle-income settings [Internet]. 2021 [cited 2023 Oct 8].  
767 Available from: [https://www.google.com/search?q=Madaj+et+al.%2C+2022&client=firefox-  
768 bd&sca\\_esv=571701597&hl=en&biw=745&bih=340&sxsrf=AM9HkKmHbNVhd5UEiZzw  
769 wIFGvdFeDDMzQw%3A1696766974913&ei=\\_psiZZyqN8C5hbIP09O\\_4AU&ved=0ahUK  
770 EwicobnGteaBAxXAXEEAHdPpD1wQ4dUDCA8&uact=5&oq=Madaj+et+al.%2C+2022&  
771 gs\\_lp=Egxnd3Mtd2l6LXNlcnAiEk1hZGFqIGV0IGFsLiwgMjAyMjIHECEY0AEYCKiLGID  
772 NB1jNB3ABeACQAQCYAfkHoAH5B6oBAZctMbgBA8gBAPgBAvgBAcICBAAGKIE  
773 GLAD4gMEGAegQYgGAZAGAw&scient=gws-wiz-serp](https://www.google.com/search?q=Madaj+et+al.%2C+2022&client=firefox-bd&sca_esv=571701597&hl=en&biw=745&bih=340&sxsrf=AM9HkKmHbNVhd5UEiZzwwIFGvdFeDDMzQw%3A1696766974913&ei=_psiZZyqN8C5hbIP09O_4AU&ved=0ahUK EwicobnGteaBAxXAXEEAHdPpD1wQ4dUDCA8&uact=5&oq=Madaj+et+al.%2C+2022&gs_lp=Egxnd3Mtd2l6LXNlcnAiEk1hZGFqIGV0IGFsLiwgMjAyMjIHECEY0AEYCKiLGIDNB1jNB3ABeACQAQCYAfkHoAH5B6oBAZctMbgBA8gBAPgBAvgBAcICBAAGKIEGLAD4gMEGAegQYgGAZAGAw&scient=gws-wiz-serp)
- 774 72. Angko W, Wulifan JK, Sumankuuro J. Health insurance coverage, socioeconomic status of  
775 women, and antenatal care utilization in Ghana. *Journal of Population and Social Studies*  
776 [JPSS]. 2023;31:62–79.
- 777 73. Okedo-Alex IN, Akamike IC, Ezeanosike OB, Uneke CJ. Determinants of antenatal care  
778 utilisation in sub-Saharan Africa: a systematic review. *BMJ open*. 2019;9(10):e031890.
- 779 74. Ousman SK, Mdala I, Thorsen VC, Sundby J, Magnus JH. Social determinants of antenatal  
780 care service use in Ethiopia: changes over a 15-year span. *Frontiers in public health*.  
781 2019;7:161.
- 782 75. Adjiwanou V, Bougma M, LeGrand T. The effect of partners’ education on women’s  
783 reproductive and maternal health in developing countries. *Social Science & Medicine*.  
784 2018;197:104–15.
- 785 76. Girma D, Dejene H, Adugna L. Predictors of Neonatal Mortality in Ethiopia: A  
786 Comprehensive Review of Follow-Up Studies. *International Journal of Pediatrics*. 2022 Feb  
787 11;2022:e1491912.
- 788 77. Olonade OY, George TO, Imhonopi D, Egharevba ME, Kasa AG. Youths’ socio-economic  
789 well-being in Southwest Nigeria: What role can empowerment/poverty reduction  
790 programmes play? *Cogent Social Sciences*. 2022 Dec 31;8(1):2115694.
- 791 78. Ngandu CB, Momberg D, Magan A, Chola L, Norris SA, Said-Mohamed R. The association  
792 between household socio-economic status, maternal socio-demographic characteristics and  
793 adverse birth and infant growth outcomes in sub-Saharan Africa: a systematic review. *Journal*  
794 *of developmental origins of health and disease*. 2020;11(4):317–34.
- 795 79. Amir-ud-Din R, Fawad S, Naz L, Zafar S, Kumar R, Pongpanich S. Nutritional inequalities  
796 among under-five children: a geospatial analysis of hotspots and cold spots in 73 low-and  
797 middle-income countries. *International Journal for Equity in Health*. 2022;21:135.



- 798 80. Cham M, Sundby J, Vangen S. Maternal mortality in the rural Gambia, a qualitative study on  
799 access to emergency obstetric care. *Reproductive Health*. 2005;2:3.
- 800 81. Salami KK, Yusuf OB, Akinyemi JO, Morhason-Bello IO, Eyelade RO, Ilori T, et al.  
801 Individual and ecological analyses of antenatal care: Prospects for delivery assistance and  
802 use of modern family planning in Nigeria. *African Journal of Reproductive Health* [Internet].  
803 2022 Nov 28 [cited 2023 Oct 8];26(11s). Available from:  
804 <https://www.ajrh.info/index.php/ajrh/article/view/3581>
- 805 82. Samuel O, Zewotir T, North D. Decomposing the urban–rural inequalities in the utilisation of  
806 maternal health care services: evidence from 27 selected countries in Sub-  
807 Saharan Africa. 2021 [cited 2023 Oct 8]; Available from:  
808 <https://www.scienceopen.com/document/doi/10.1080/1064293de-6b13-4bf6-8641-0df210ccdc44/1>  
809 [PubMedCentral/064293de-6b13-4bf6-8641-0df210ccdc44.pdf](https://pubmed.ncbi.nlm.nih.gov/39111111/)

810

811

812

813

814
